# Supplementary material for: Air-stable lithium-sandwiched current collector for non-destructive, thermally safe, and sustained supplementary lithiation
Source: Royal Society of Chemistry journal article supplement (doi:10.1039/d4ee02522a), 2024-01-01
Supplement: d4ee02522a2.pdf [file d4ee02522a2.pdf]

## Supplementary Information

### Air-Stable Lithium-Sandwiched Current Collector for Non-Destructive, Thermally safe, and Sustained Supplementary Lithiation

Can Zhang<sup>†</sup>, Xinlong Chen<sup>†</sup>, Wang Wan, Ganxiong Liu, Quan Nie, Fangzhou Yang, Xueyang Li, Sa Li, Yunhui Huang and Chao Wang\*

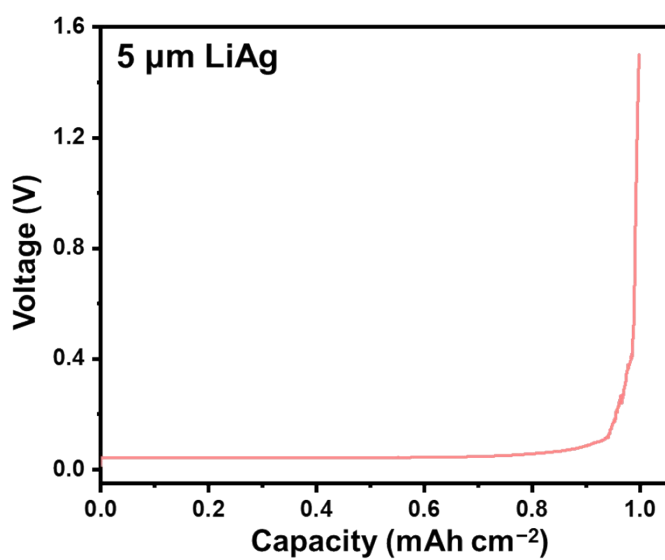

Figure S1. The delithiation curve of 5 μm-thick LiAg alloy foil.

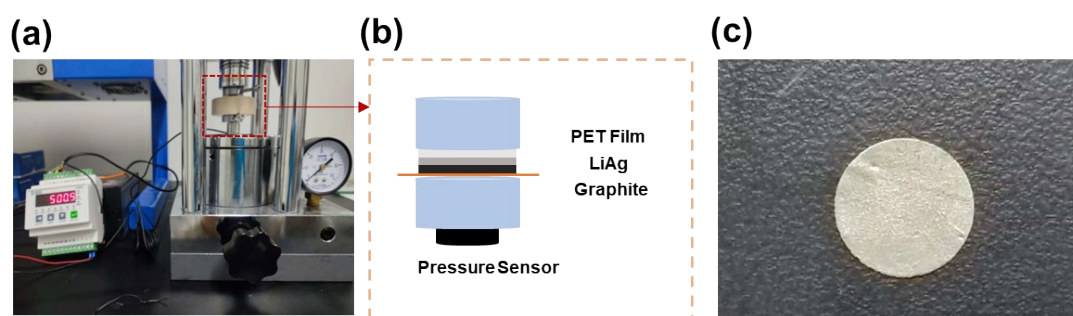

Figure S2. (a-b) The illustration of device for applying pressure for contact prelithiation. (c) The photograph of Gr/LiAg electrode before applying pressure.

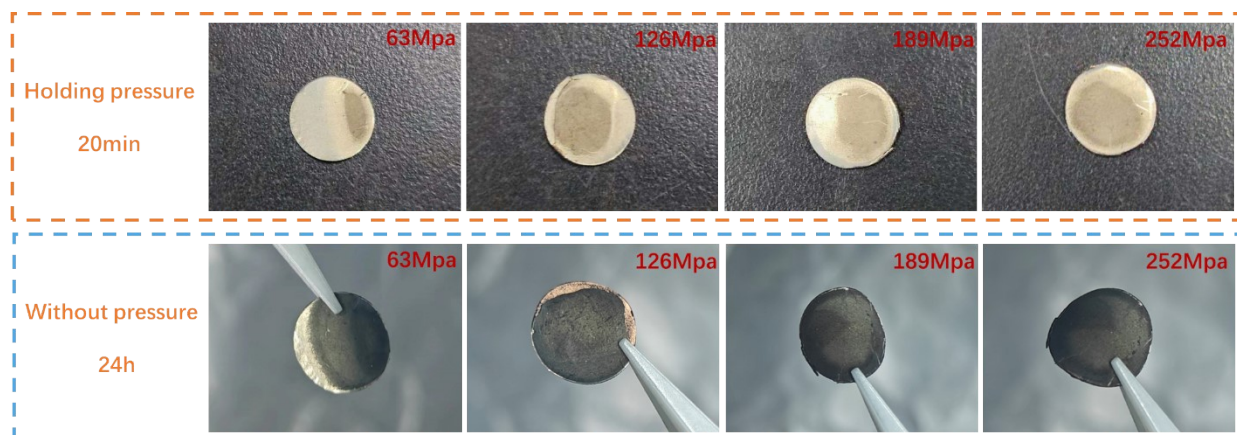

Figure S3. The color changes of Gr/LiAg electrode after applying different pressure and duration.

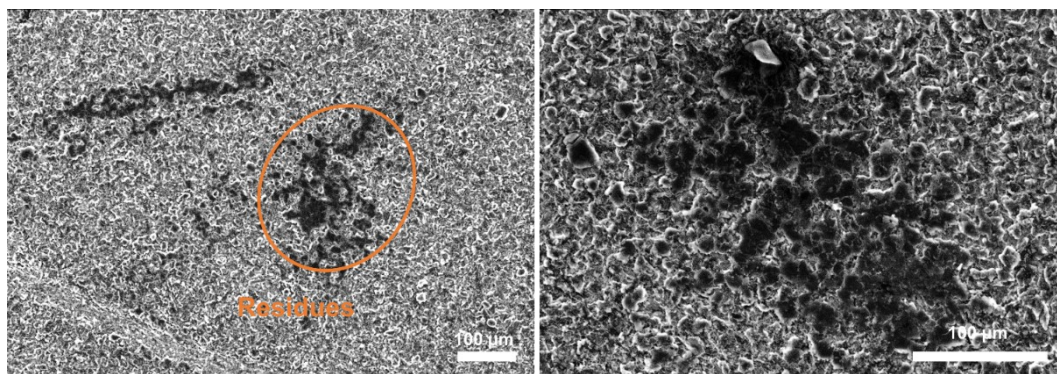

Figure S4. The SEM images of Gr/LiAg electrode after 24-h rest in the glove box.

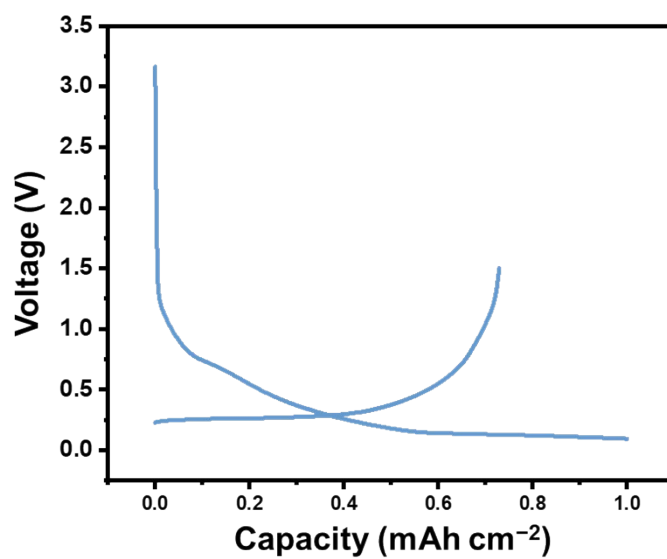

Figure S5. The voltage-capacity curve of the electrochemical prelithiation of 1 mAh cm<sup>-2</sup>.

Observation

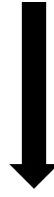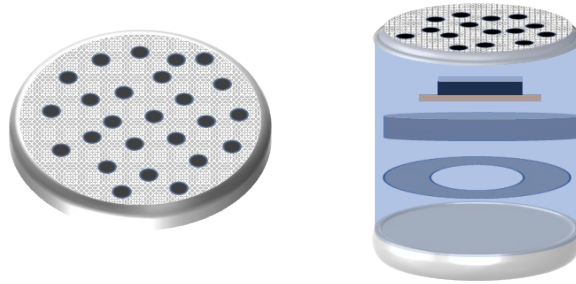

Figure S6. In-situ observation of contact prelithiation process.

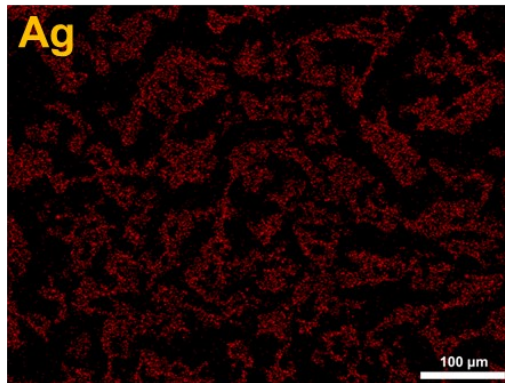

Figure S7. The distribution of element Ag within surficial alloy residues.

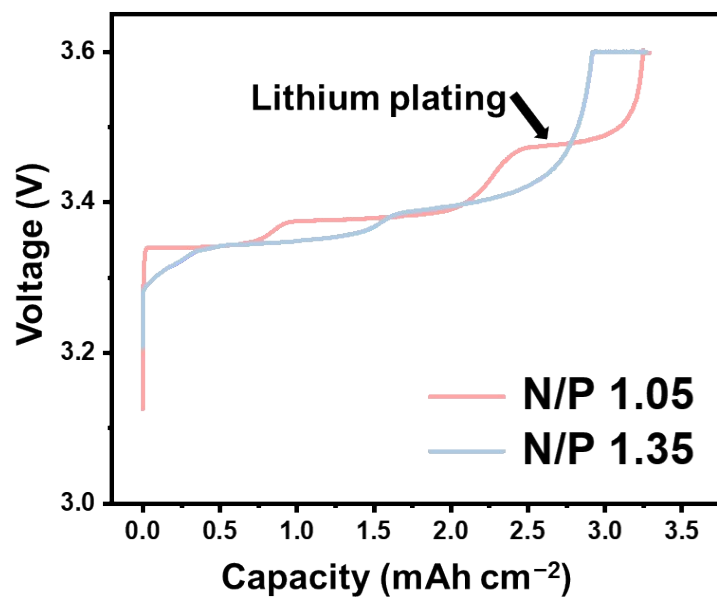

Figure S8. The charging curve of LFP||Gr-Contact prelithiation full cells with different N/P ratios.

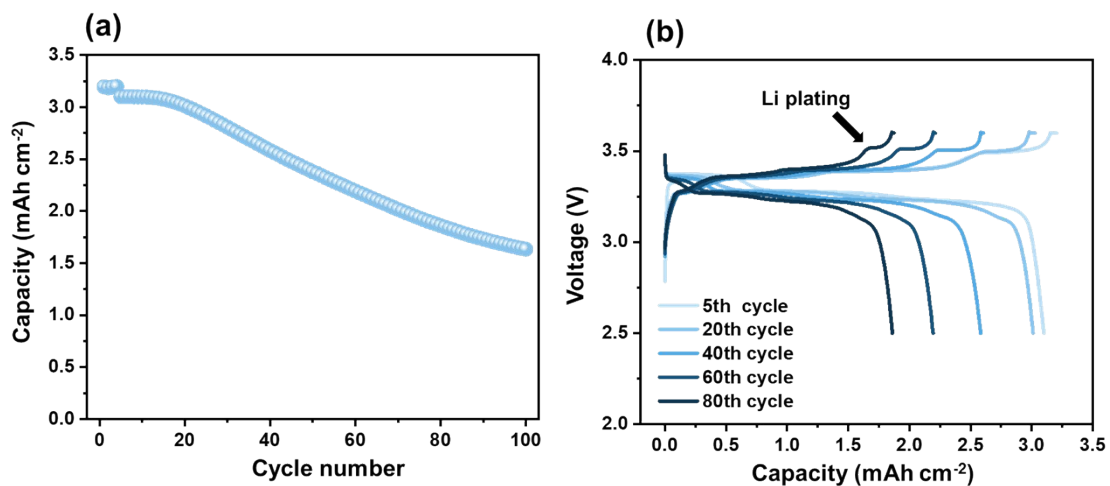

Figure S9. (a) The cycling performance and (b) the charge-discharge curves of the LFP||Gr contact prelithiation cell with an N/P ratio of 1.05.

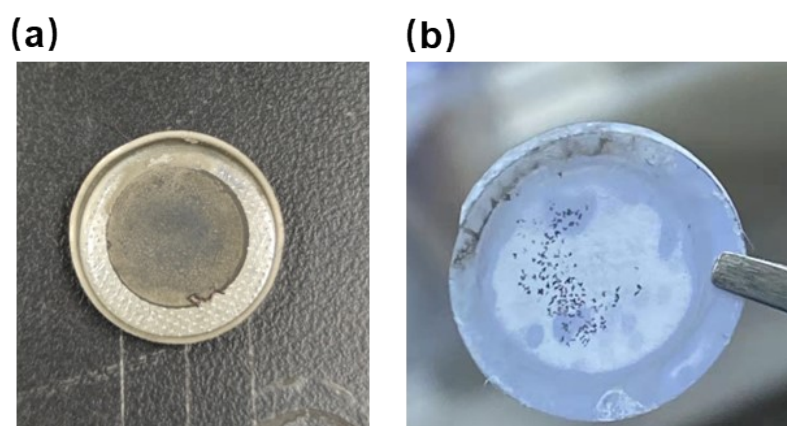

Figure S10. The residues on anode (a) and separator (b).

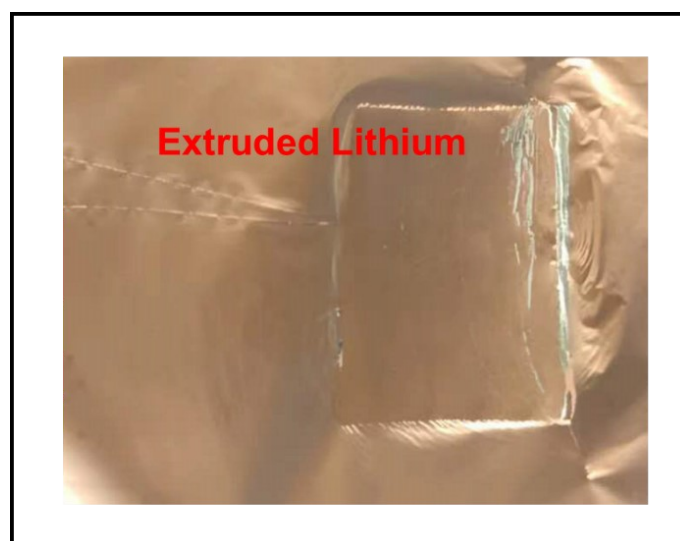

Figure S11. The photo of Cu-Li-Cu with extruded lithium.



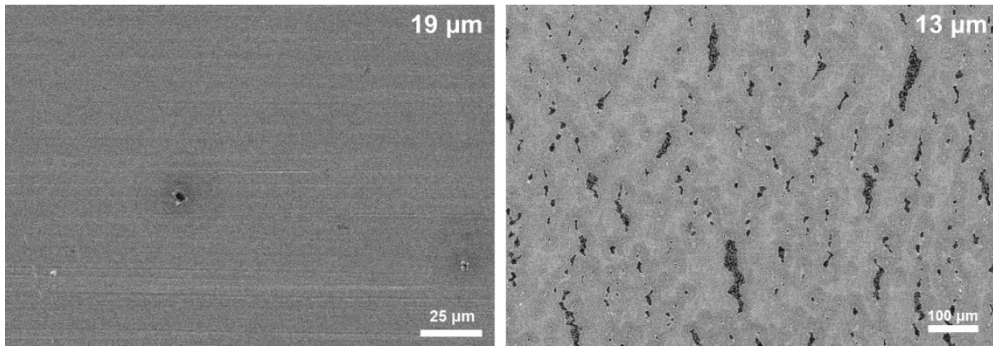

Figure S12. The morphology of the surface hole on CLC of 19  $\mu\text{m}$  and 13  $\mu\text{m}$  thick.

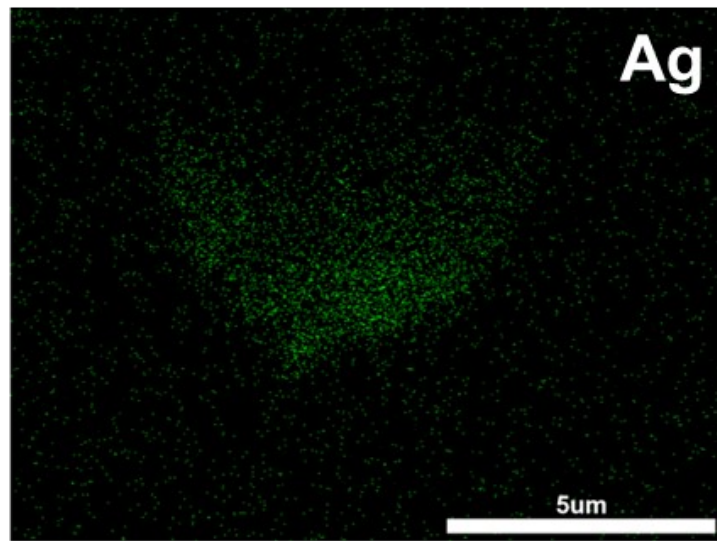

Figure S13. The distribution of element Ag within holes of CLC-16.

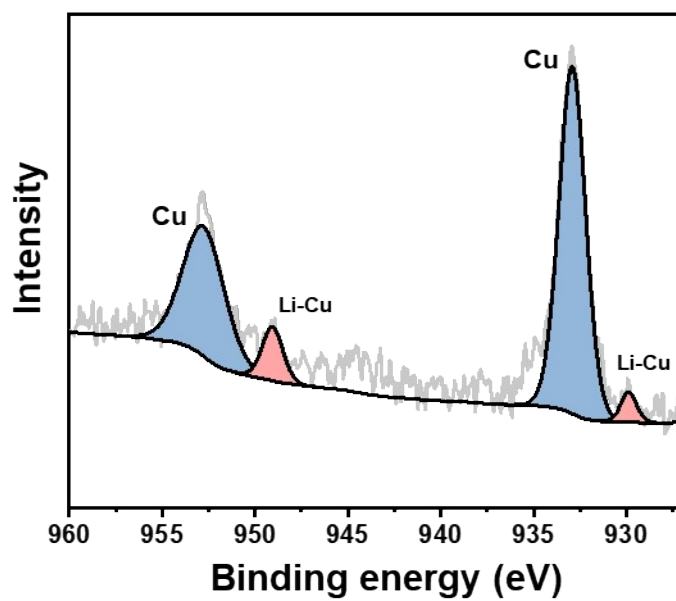

Figure S14. The XPS result of Cu element at LiAg/Cu interface.

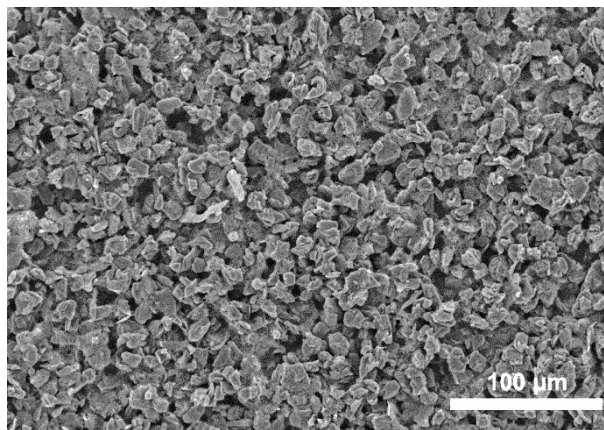

Figure S15. The surface morphology of graphite electrode on Cu foil.



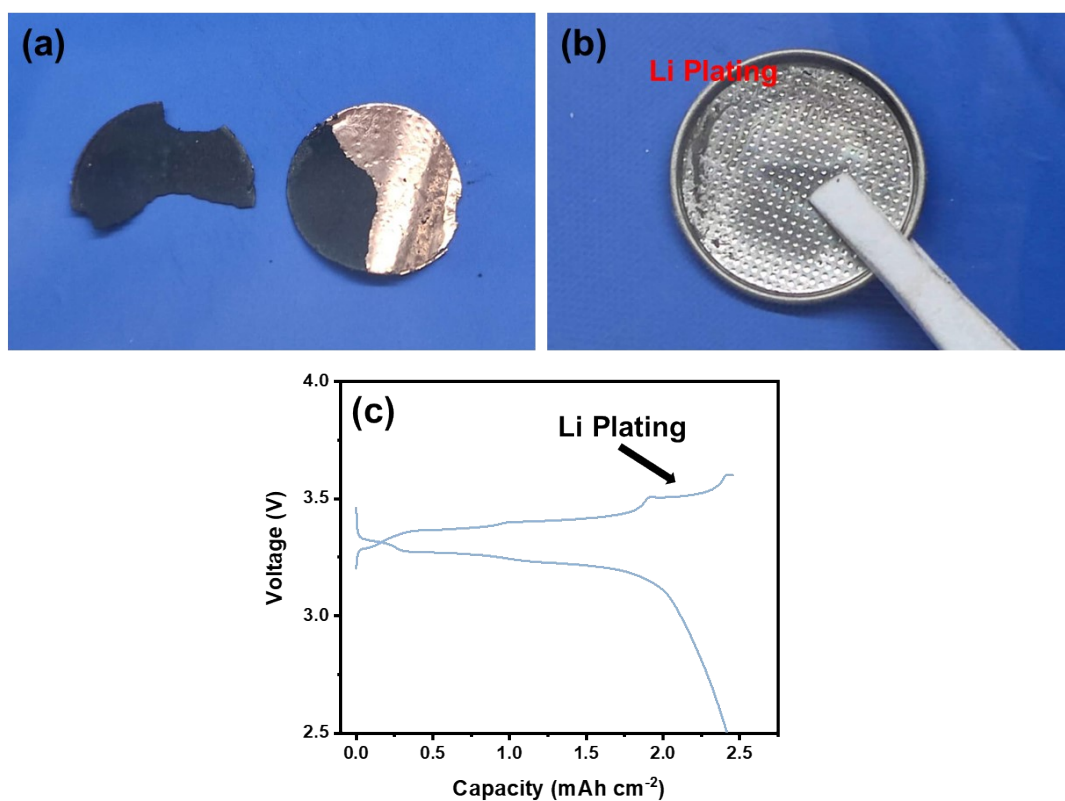

Figure S16. (a) Delamination of bulk graphite from CLC-13. (b) Lithium deposition surrounding the graphite electrode. (c) Voltage-Capacity curve of the 95th cycle for LFP||Gr-CLC-13 full cell.

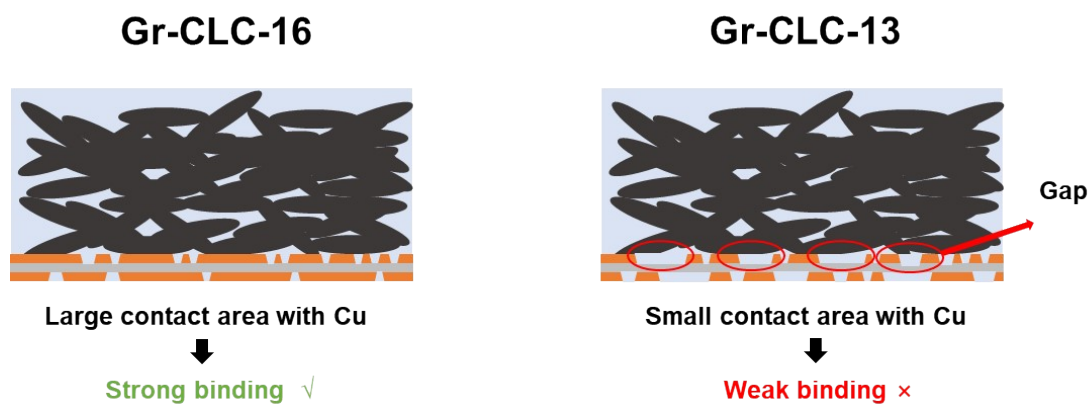

Figure S17. The decreased contact area between CLC-13 and active material after lithium dissolution.

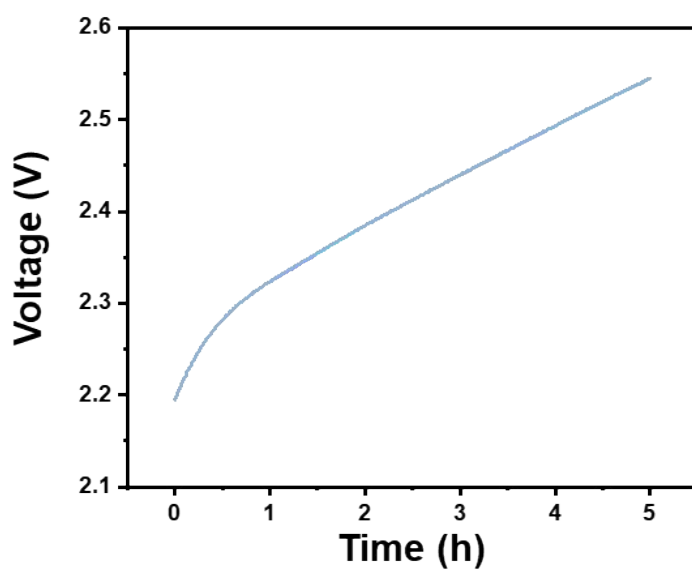

Figure S18. The voltage change of LFP||Gr-CLC-16 full cell during rest procedure.

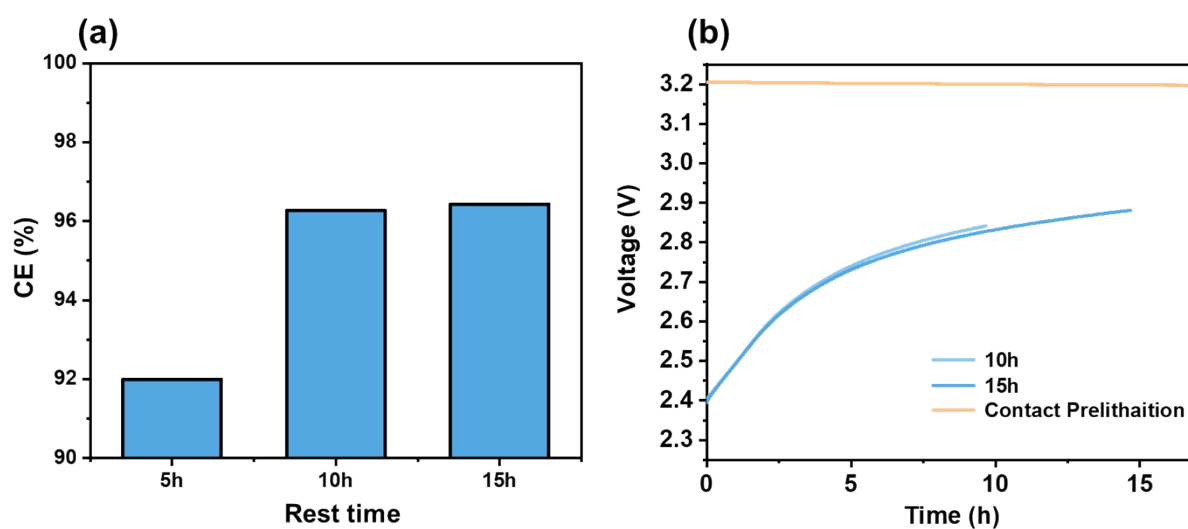

Figure S19. (a) The ICE change of LFP||Gr-CLC-16 after different rest times. (b) The voltage changes of LFP||Gr-CLC-16 during the rest period.

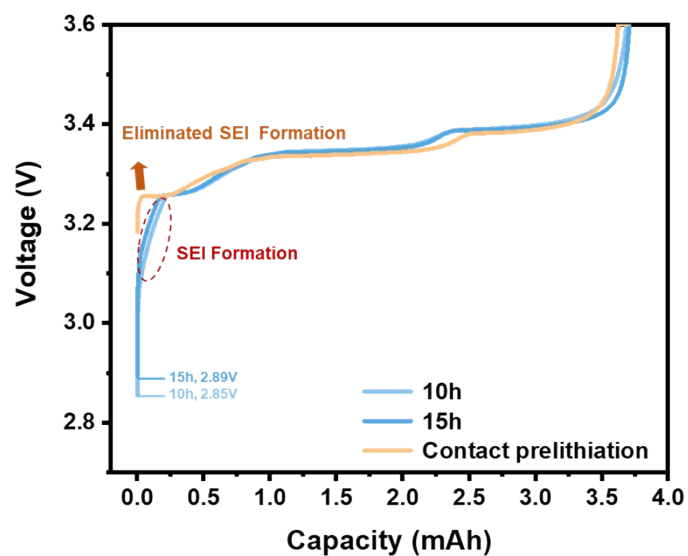

Figure S20. The initial charging curve of the LFP||Gr-CLC-16 cell after different rest times. The LFP||Gr-Contact prelithiation was used as a comparison.

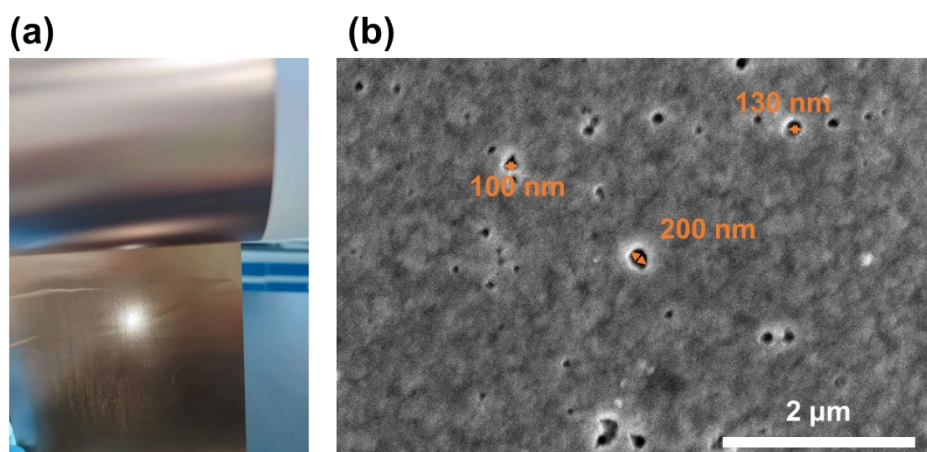

Figure S21. The porous Cu foil with pore sizes lower than 200nm.

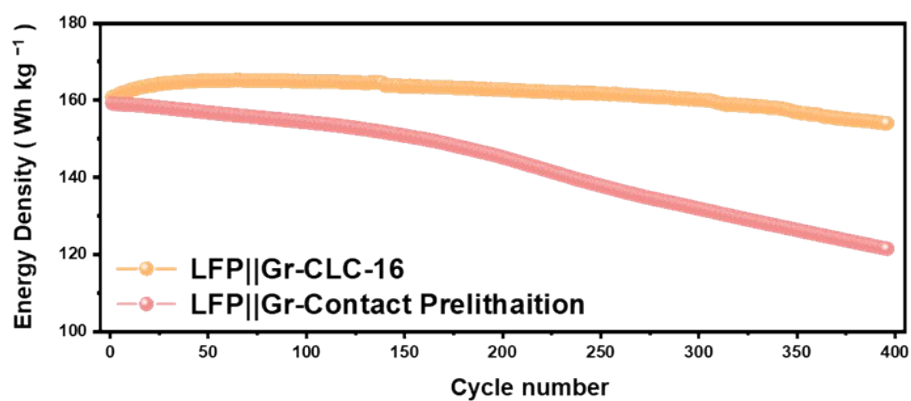

Figure S22. The energy density comparison between LFP||Gr-CLC-16 and LFP||Gr-Contact prelithiation.

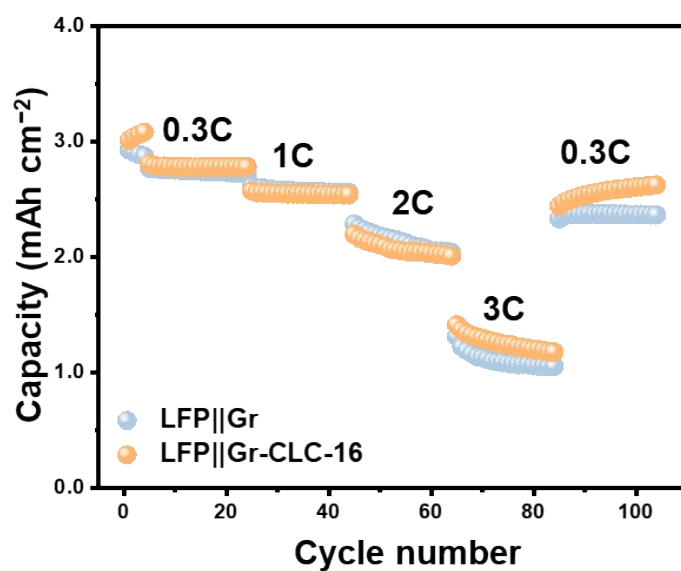

Figure S23. The rate performance of LFP||Gr-CLC-16 full cell.

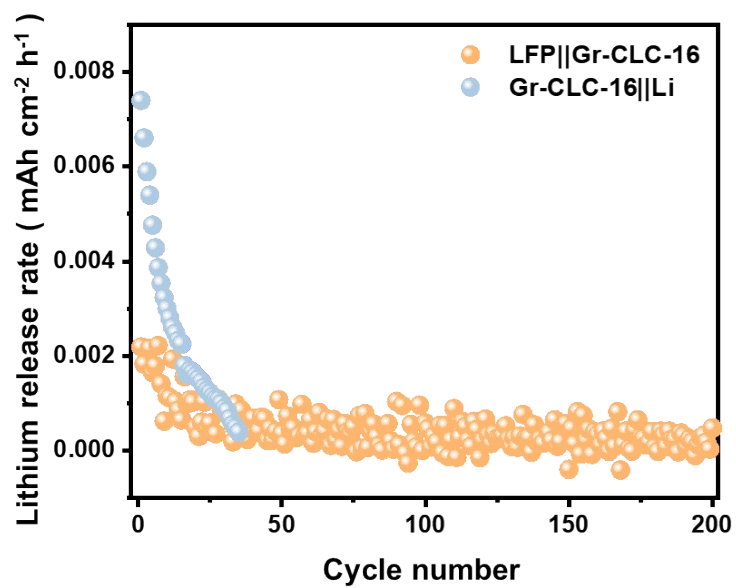

Figure S24. The lithium release rate comparison for LFP||Gr-CLC-16 and Gr-CLC-16||Li.

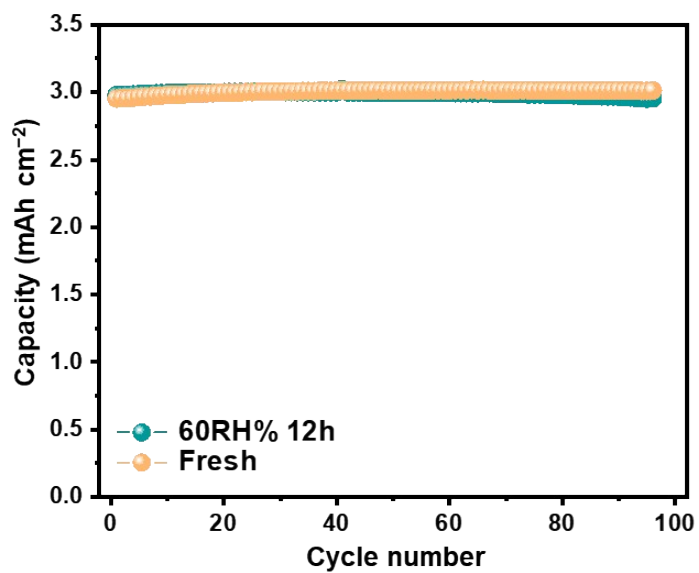

Figure S25. The cycling performance of LFP||Gr-CLC-16 full cell after being exposed to air for 12h.

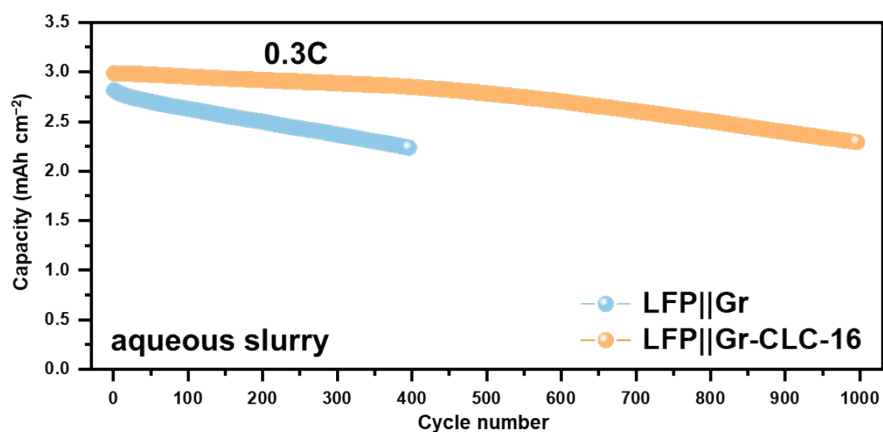

Figure S26. The long-term cycling performance of LFP||Gr-CLC-16 full cell using water as coating slurry solvent.

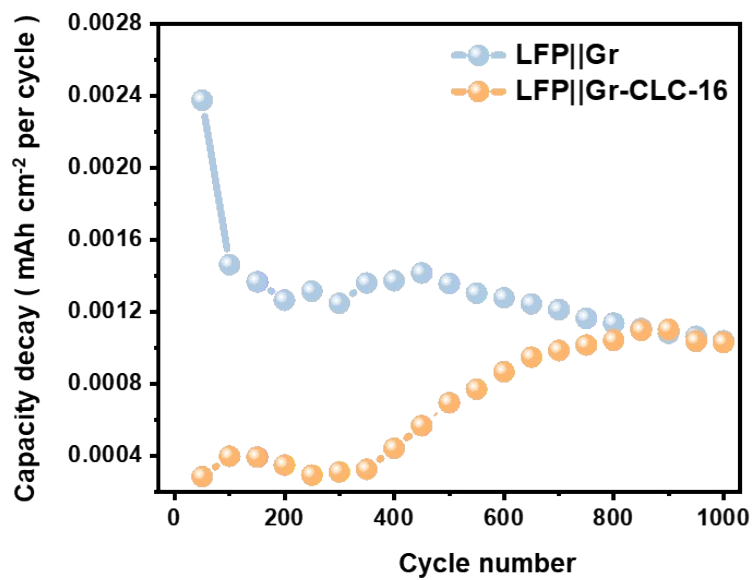

Figure S27. The capacity decay rate comparison between LFP||Gr-CLC-16 and LFP||Gr full cell.



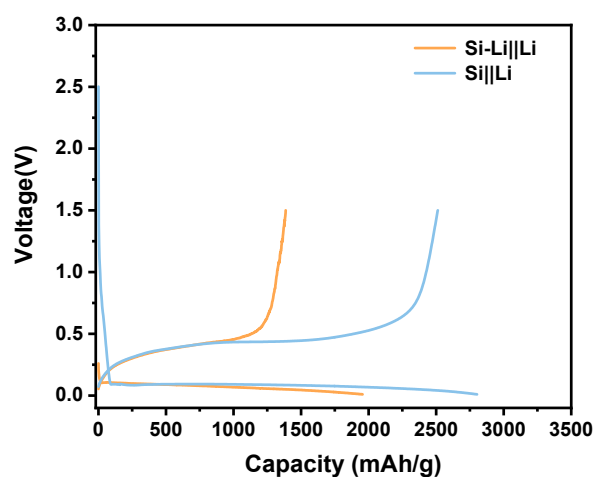

Figure S28. The discharge-charge curve of the first cycle for Si-LiAg||Li and Si||Li half cell.

**Table S1.** Comparison of electrochemical performances of batteries with prelithiation

| Battery Type | ICE (%) | Current Density | Cycles | Capacity Retention | Area Capacity (mAh cm <sup>-2</sup> ) | Reference |
|--------------|---------|-----------------|--------|--------------------|---------------------------------------|-----------|
| LFP  Gr      | 94.9    | 0.2C            | 200    | 77%                | 0.93                                  | 1         |
| LFP  Gr      | /       | 0.2C            | 60     | 99.3%              | 0.77                                  | 2         |
| LFP  Gr      | 95.88   | 0.5C            | 195    | 99.8%              | 0.9                                   | 3         |
| LCO  Gr      | 94.3%   | 0.2C            | 100    | 78.4%              | 2.16                                  | 4         |
| LFP  Gr      | 97%     | 0.56C           | 60     | /                  | 0.48                                  | 5         |
| LFP  Gr      | 98%     | 0.2C            | 60     | 92.1%              | 1.28                                  | 6         |
| LFP  Gr      | 98.4%   | 0.1C            | 100    | 94.6%              | 3.4                                   | 7         |
| LFP  Gr      | 92%     | 0.3C            | 400    | 96%                | 3.3                                   | Our work  |

### The calculation of Li<sup>+</sup> releasing rate during full cell cycling.

The Li<sup>+</sup> releasing rate from CLC during each cycle of the full cell is calculated as follows:

$$Q_{compensated}(n) = Q_{charge}(n) * (CE_{CLC-16}(n) - CE_{Gr}(n))$$

Where  $n$  represents the  $n$ th cycle,  $Q_{charge}(n)$  and  $CE_{CLC-16}(n)$  represents the charge capacity and the Coulombic efficiency for LFP||Gr-CLC-16.  $CE_{Gr}(n)$  corresponds to the Coulombic efficiency for LFP||Gr full cell.

### The energy density comparison for LFP||Gr-CLC-16 and LFP||Gr-contact prelithiation

Due to the presence of pinholes on CLC-16, the actual area density of CLC-16 is 8.84 mg cm<sup>-2</sup> (based on the average value of 10 pieces of CLC-16 disks with a diameter of 12mm), only slightly higher than that of 10 μm-thick Cu foil (8.63 mg cm<sup>-2</sup>). In contrast, with contact prelithiation, the extra graphite loading to prevent lithium deposition results in a mass increase of 2.68 mg cm<sup>-2</sup>, far surpassing that brought by CLC-16. The energy density was determined based on the total mass of the electrodes, electrolyte, and separator as follows:

$$\text{Energy density (ED)} = \frac{\text{Discharge energy}}{M_{anode} + M_{cathode} + M_{electrolyte} + M_{separator}}$$

The energy density for the initial cycle of the LFP||Gr-CLC-16 and LFP||Gr-contact prelithiation is calculated:

$$ED_{CLC-16} = \frac{0.010671 \text{ Wh}}{(0.0223 + 0.02887 + 0.01342 + 0.00177) * 10^{-3} \text{ kg}} = 160.80 \text{ Wh/kg}$$

$$ED_{\text{Contact prelithiation}} = \frac{0.011098 \text{ Wh}}{(0.02579 + 0.02887 + 0.01342 + 0.00177) * 10^{-3} \text{ kg}} = 158.88 \text{ Wh/kg}$$

Hence, although the discharge capacity of the LFP||Gr-CLC-16 is slightly lower than that of contact prelithiation, the energy density of the Gr-CLC-16 surpasses that of Gr-contact prelithiation from the initial cycling

### Reference

1. S. Xu, Q. Fang, J. Wu, S. Weng, X. Li, Q. Liu, Q. Wang, X. Yu, L. Chen, Y. Li, Z. Wang and X. Wang, *Small*, 2024, 20, 2305639.
2. X.-Y. Yue, Y.-X. Yao, J. Zhang, S.-Y. Yang, Z. Li, C. Yan and Q. Zhang, *Advanced Materials*, 2022, 34, 2110337.
3. C. Yang, H. Ma, R. Yuan, K. Wang, K. Liu, Y. Long, F. Xu, L. Li, H. Zhang, Y. Zhang, X. Li and H. Wu, *Nature Energy*, 2023, 8, 703-713.
4. X. Zhao, R. Yi, L. Zheng, Y. Liu, Z. Li, L. Zeng, Y. Shen, W. Lu and L. Chen, *Small*, 2022, 18, 2106394.
5. Y. Shen, X. Shen, M. Yang, J. Qian, Y. Cao, H. Yang, Y. Luo and X. Ai, *Advanced Functional Materials*, 2021, 31, 2101181.
6. X.-Y. Yue, Y.-X. Yao, J. Zhang, Z. Li, S.-Y. Yang, X.-L. Li, C. Yan and Q. Zhang, *Angewandte Chemie International Edition*, 2022, 61, e202205697.
7. C. Wang, F. Yang, W. Wan, S. Wang, Y. Zhang, Y. Huang and J. Li, *Energy & Environmental Science*, 2023, 16, 4660-4669.
